# Supplementary material for: System-Level Analysis of Neuroblastoma Tumor–Initiating Cells Implicates AURKB as a Novel Drug Target for Neuroblastoma
Source: Oxford University Press journal article supplement (doi:10.1158/1078-0432.ccr-10-0627), 2010-07-22
Supplement: 10780432ccr100627-sup-supplementary_table_s1.xls [file 10780432ccr100627-sup-supplementary_table_s1.xls]

## Sheet: Sheet1
Library ID	Tissue source	Aligned sequence, bp
HS0382	Neuroblastoma TICs	6739934150
HS0627	Neuroblastoma TICs	3985563940
HS0499	Neuroblastoma TICs	2476237136
HS0502	Neuroblastoma TICs	2215675756
HS1040	Neuroblastoma TICs	3729063600
HS1041	Neuroblastoma TICs	4313933000
HS1149	Neuroblastoma TICs	5822325000
HS1151	Neuroblastoma TICs	3374707500
HS1241	Neuroblastoma TICs	3214430500
HS1593	Neuroblastoma TICs	5252354800
HS1042	SKP	4209705900
HS1043	SKP	4453217800
HS1151	SKP	3374707500
HS0299	Breat cancer cell line	1119888180
HS0327	Ovarian tumor	1415520768
HS0419	Breat cancer cell line	1177457184
HS0445	Breat cancer cell line	1828856952
HS0462	Ovarian tumor	1915337292
HS0463	Ovarian tumor	856303704
HS0464	Ovarian tumor	868958028
HS0465	Ovarian tumor	1058404872
HS0466	Ovarian tumor	1295742888
HS0467	Ovarial cancer cell line	775075260
HS0468	Ovarian tumor	2698323072
HS0469	Ovarian tumor	1374384648
HS0470	Ovarian tumor	2285498720
HS0471	Ovarian tumor	1393590120
HS0511	Breat tumor	6236709588
HS0644	Lymphoma	5816275584
HS0652	Lymphoma	2332176480
HS0663	Lung tumor	283413396
HS0701	Ovarian tumor	1074023336
HS0702	Ovarian tumor	1830544072
HS0703	Ovarian tumor	1422457368
HS0706	Lung tumor	1459970088
HS0708	Ovarian tumor	1760040532
HS0709	Oligodendroglioma cell line	2741182488
HS0724	Blood from a cancer patient	2119757136
HS0727	Lung tumor	2421817104
HS0728	Lung tumor	4112016636
HS1085	Oligodendroglioma tumor	5024879600
HS1086	Oligodendroglioma tumor	6907718400
HS1400	Metastatic adenocarcinoma tumor	12806918200
